# Supplementary material for: Neural Basis for Economic Saving Strategies in Human Amygdala-Prefrontal Reward Circuits
Source: PubMed Central journal article supplement (PMC5130697; doi:10.1016/j.cub.2016.09.016), 2016-11-21
Supplement: mmc1.pdf [file mmc1.pdf]

**Current Biology, Volume 26**

**Supplemental Information**

**Neural Basis for Economic Saving Strategies  
in Human Amygdala-Prefrontal Reward Circuits**

**Leopold Zangemeister, Fabian Grabenhorst, and Wolfram Schultz**

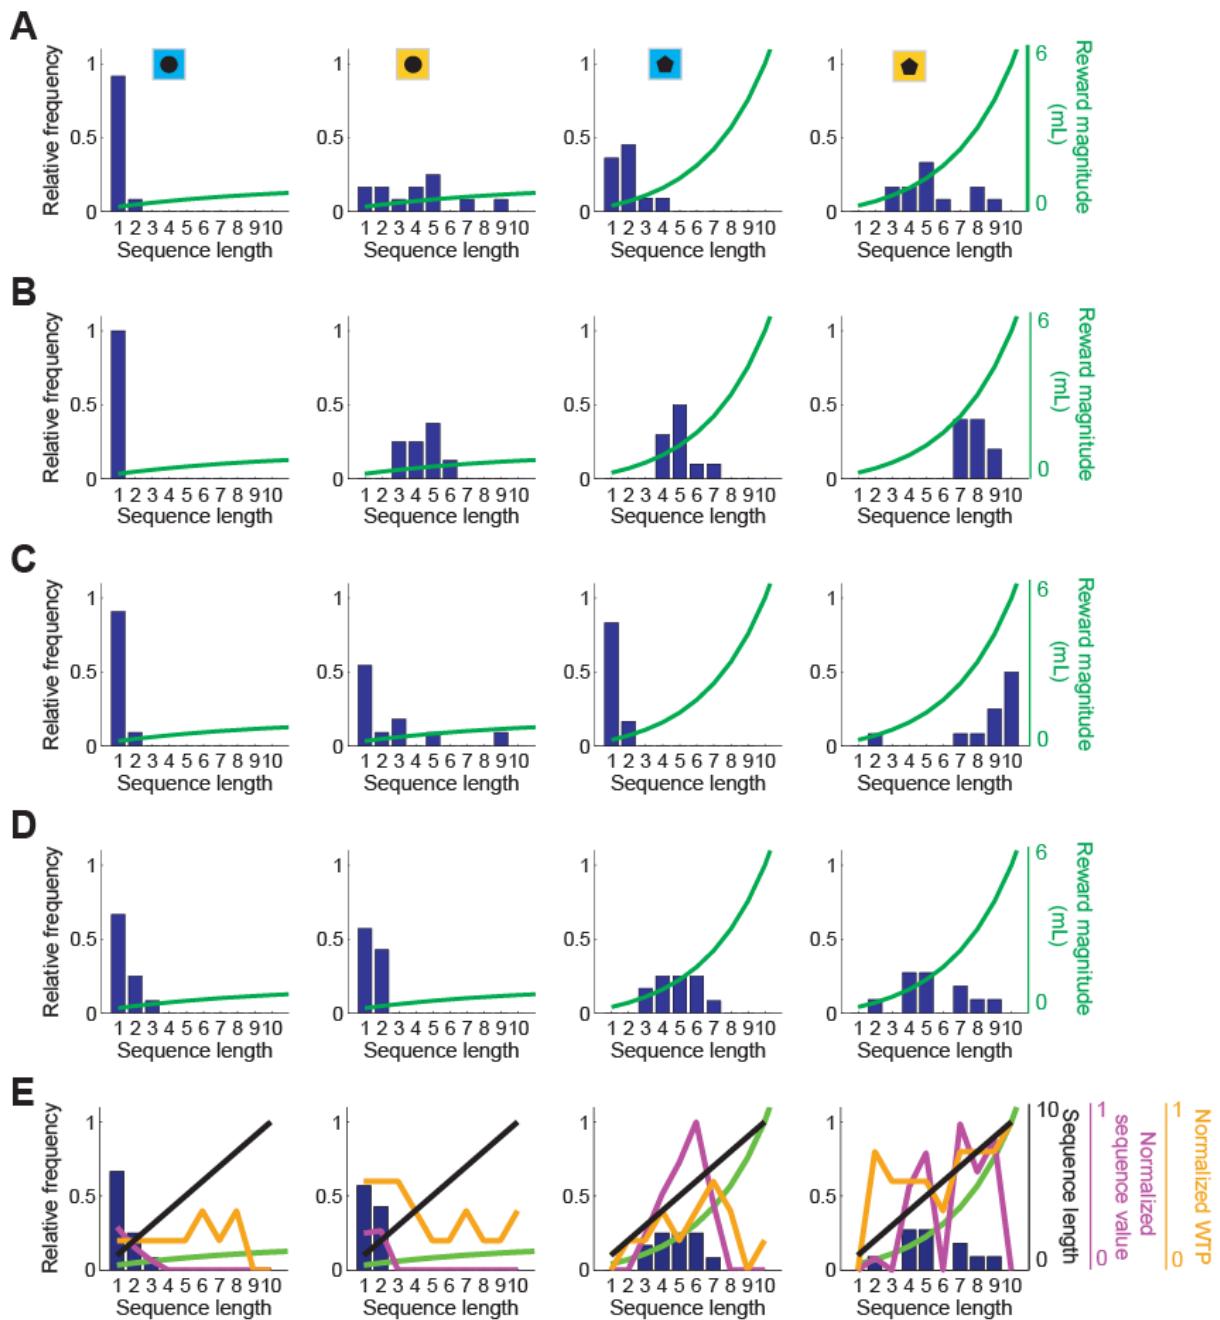

**Figure S1 (related to Figure 1) | Choice frequencies in single subjects. A-D**, Saving behavior in four representative subjects. Bars show relative frequencies with which the subject produced different choice sequences. Green curves show reward magnitude increases over sequential save choices. In each plot conditions are as follows (from left to right): Low fat, low interest; high fat, low interest; low fat, high interest; high fat, high interest. The figure illustrates variations in saving behavior both across subjects and experimental conditions. **E**, Same subject as in panel d. In addition to relative frequency and reward magnitude, the graphs show normalized sequence length (black) and normalized sequence value (magenta) regressors. These plots illustrate how sequence length and value could vary independently in our two-factorial design. Note how normalized sequence length increases linearly, while sequence value and WTP do not follow a linear pattern. Note also that sequence value estimates (magenta line) with a

value of zero result from subjects not choosing this particular sequence length during the experiment. Thus these zero values were not used in our main fMRI analysis to predict sequence value.

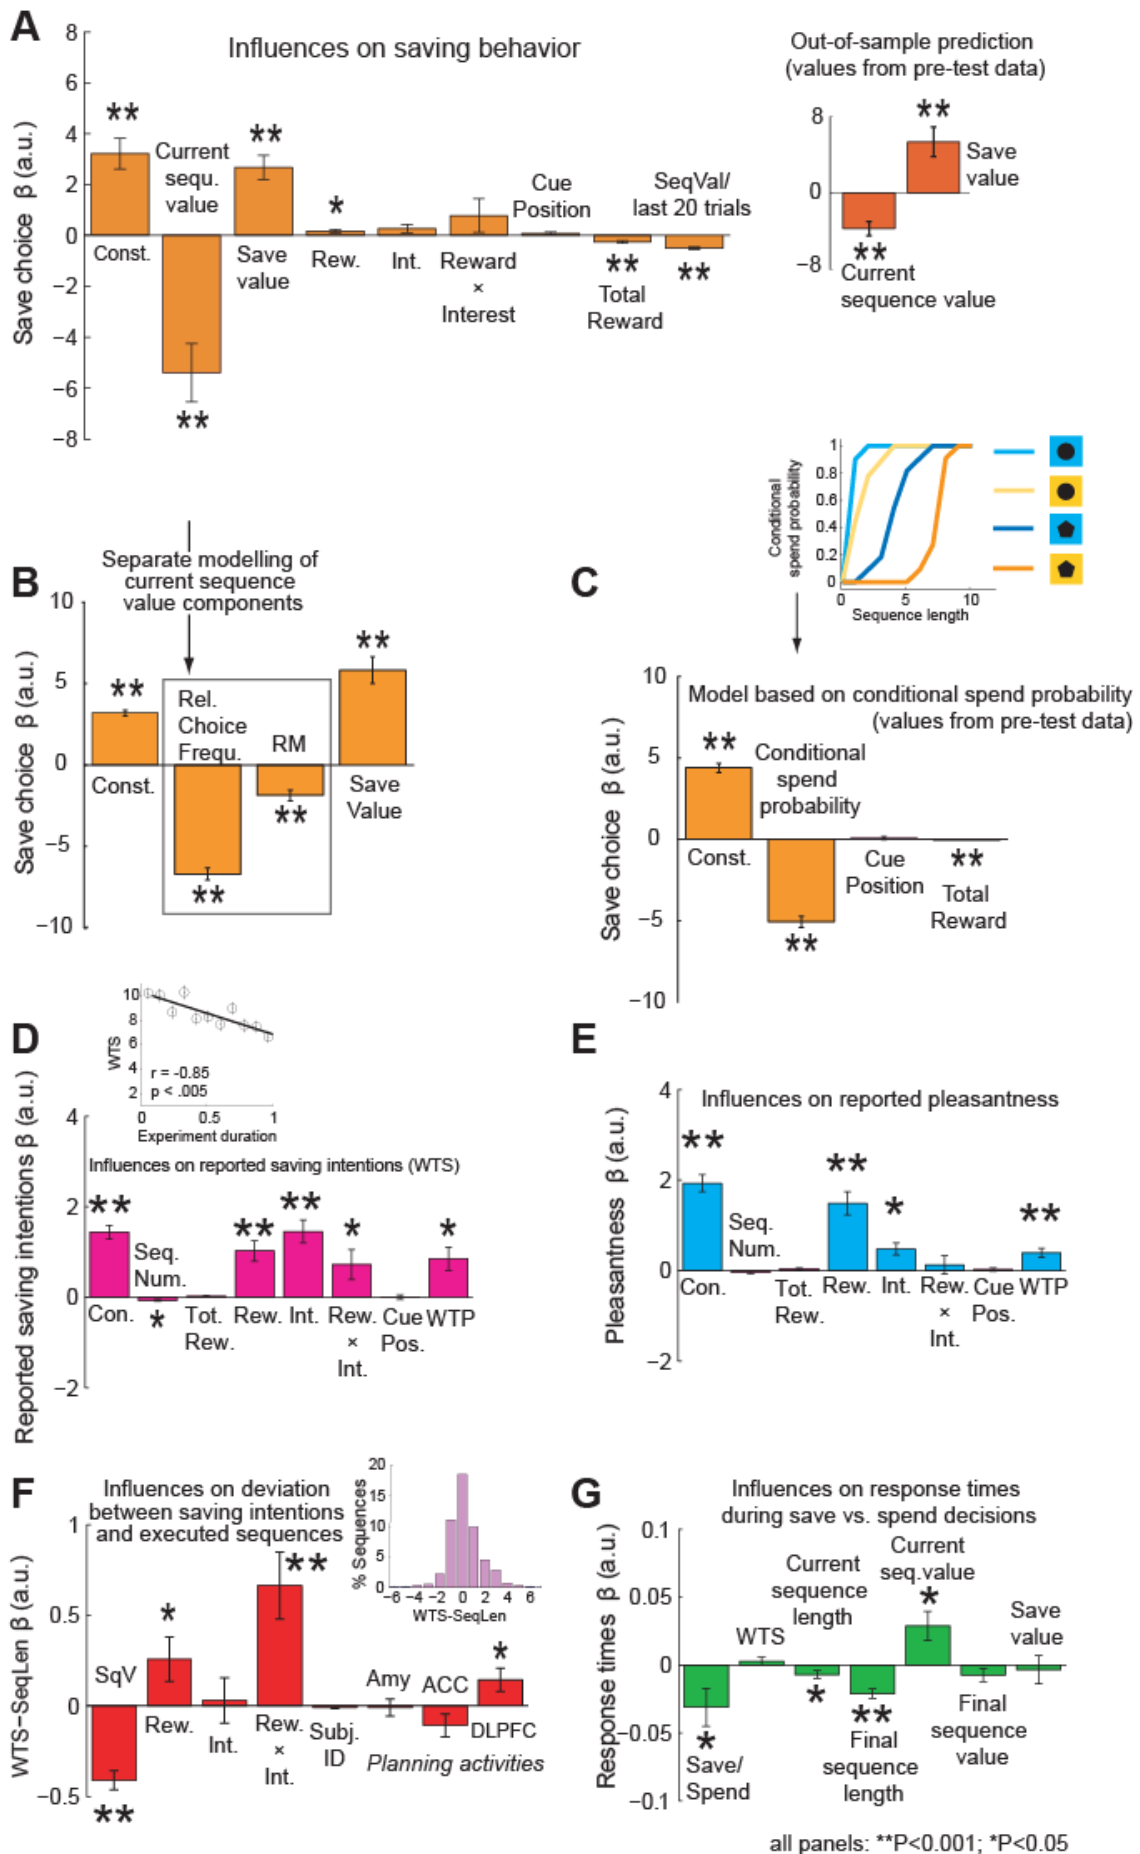

**Figure S2 (related to Figures 1, 2, 4 and 5) | Behavioral regression analyses.** **A**, Logistic regression of save-spend choices on subjective values (current sequence value, save value), reward type, interest rate, reward type  $\times$  interest rate, left-right cue position, total reward (cumulative consumed reward in mL across sessions) and running average of sequence value across the last 20 trials. Shown are regression coefficients ( $\pm$  s.e.m.) obtained by fitting a logistic regression model to each subject's choices. Positive coefficients indicate a positive weight on save choice likelihood. Significance was tested by one-sample t-test on coefficients from all subjects (random-effects analysis). Current sequence value ( $t(23) = -4.72$ ) and save value ( $t(23) = 5.62$ ) were the main weights on choices (reward:  $t(23) = 2.53$ ; interest  $t(23) = 1.63$ ; reward  $\times$  interest  $t(23) = 1.19$ ; cue position  $t(23) = 1.39$ ; total reward ( $t(23) = -5.44$ ); running average of sequence value across the last 20 trials ( $t(23) = -9.16$ )). Inset: value coefficients remained significant when values were derived from independent behavioral data of a pre-scanning session (out-of-sample prediction;  $P < 0.001$ ; current sequence value:  $t(23) = -4.34$ ; save value:  $t(23) = 3.83$ ). Adding length of previous saving sequence did not affect results (last sequence length  $P > 0.05$ ,  $t(23) = -0.7$ ). **B**, Separate modeling of sequence value components. Logistic regression showing effect of relative choice frequency ( $t(23) = -18.34$ ) and current-trial reward magnitude ( $t(23) = -5.49$ ). **C**, Logistic regression showing effect of cumulative spend choice probability ( $t(23) = -14.37$ ), cue position ( $t(23) = -0.13$ ) and total accumulated reward ( $t(23) = -5.17$ ) on choices. Cumulative choice probability was defined as the sum of relative choice frequencies up to the current trial derived from a separate behavioral session. **D**, Multiple linear regression on reported saving intentions ( $n = 22$ ). Results show effects of sequence number ( $t(21) = -2.99$ ), total reward ( $t(21) = 1.06$ ), reward type ( $t(21) = 4.63$ ), interest rate condition ( $t(21) = 5.69$ ), their interaction ( $t(21) = 2.12$ ), cue position ( $t(21) = 0.0002$ ) and willingness-to-pay for the current sequence ( $P < 0.05$ ;  $t(21) = 3.35$ ). Experiment progress had an effect but across subjects this was relatively small compared to other regressors of interest. Inset shows the distribution of deviations between reported saving intentions and chosen sequence lengths. **E**, Multiple linear regression ( $n = 22$ ) showing effects of sequence number ( $t(21) = -1.47$ ), total reward ( $t(21) = 1.59$ ), reward type ( $t(21) = 5.77$ ), interest rate condition ( $t(21) = 3.67$ ), their interaction ( $t(21) = 0.61$ ), cue position ( $t(21) = 0.56$ ) and willingness-to-pay ( $t(21) = 3.94$ ) on reported pleasantness of reward. **F**, Influences on deviation (WTS minus sequence length). Shown are regression coefficients ( $\pm$  s.e.m.) from a multiple linear regression analysis across subjects and trials (fixed effects). Sequence value ( $t(1010) = -7.81$ ), reward type ( $t(1010) = 2.09$ ), interaction of reward type and interest rate ( $t(1010) = 3.57$ ) and DLPFC BOLD signal during planning ( $t(1010) = 2.23$ ) each had a significant effect. **G**, Response time analysis. Shown are regression coefficients ( $\pm$  s.e.m.) from a multiple linear regression analysis across subjects and trials (fixed effects) on the response times. Response times were affected by the subjects' choice (save/spend dummy variable (0/1),  $t(4811) = -2.25$ ), became shorter throughout a sequence (current sequence length,  $t(4811) = -2.34$ ), were shorter in longer sequences (final sequence length,  $t(4811) = -6.04$ ), were related to current sequence value ( $t(4811) = 2.67$ ) but were not related to

reported saving intentions (WTS,  $t(4811) = 0.96$ ) or final sequence value ( $t(4811) = -1.54$ ) or save value ( $t(4811) = -0.33$ ).

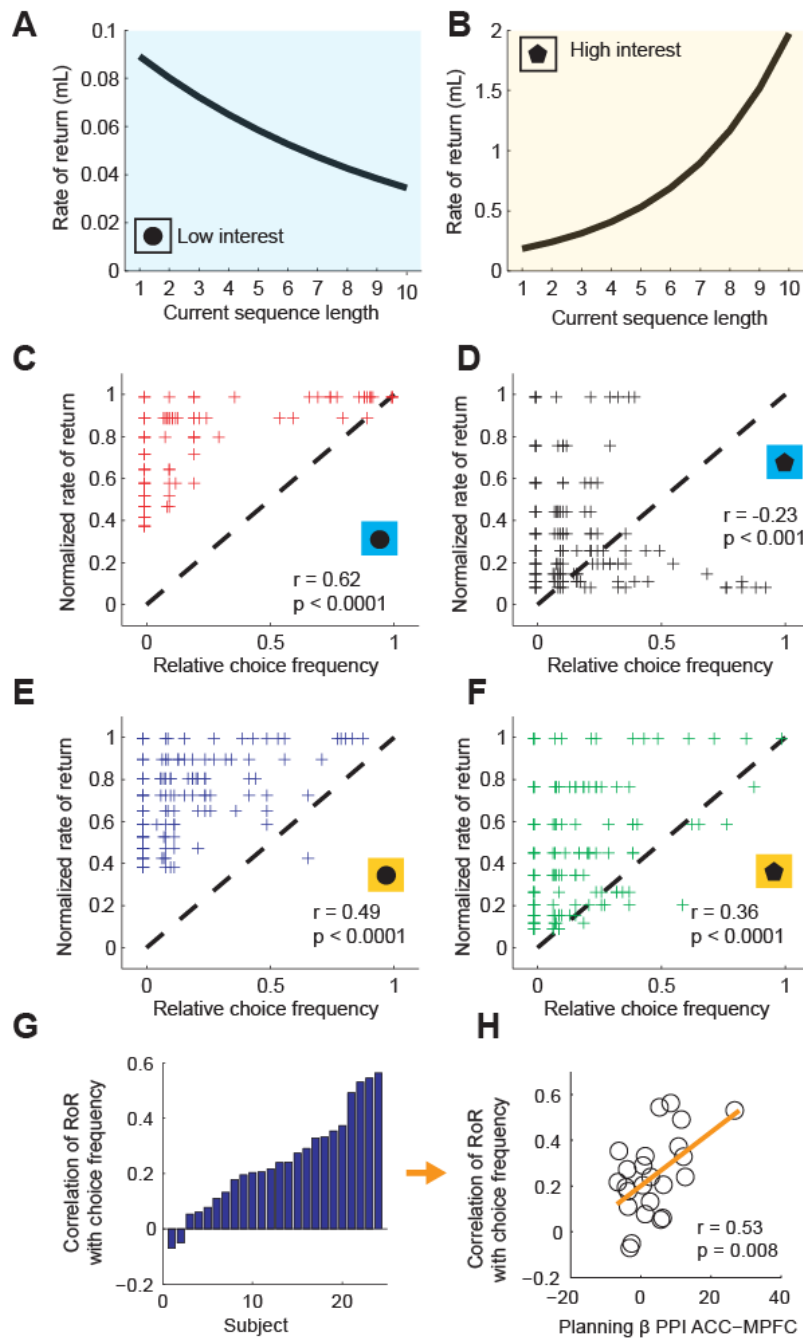

**Figure S3 (related to Figures 1 and 4) | Relation of subjects' behavior to trial-by-trial rate of return.** **A-B**, Diagrams showing the rate of return, defined as the additional reward (mL) to be gained by deciding to save in the current trial. **C-F**, scatter plots showing the relationship between relative choice frequency and rate of return. Subjects' observed relative choice frequencies were positively related to the rate of return in all conditions except the low fat, high interest condition. Here subjects showed shorter sequence lengths regardless of the positively developing rate of return. **G**, For each subject, we pooled the data across conditions and correlated rate of return with relative choice frequency. Shown is the distribution of correlation coefficients across subjects. **H**, across subjects, the matching of rate of return and choice frequency was related to connectivity strengths between ACC and MPFC during planning.

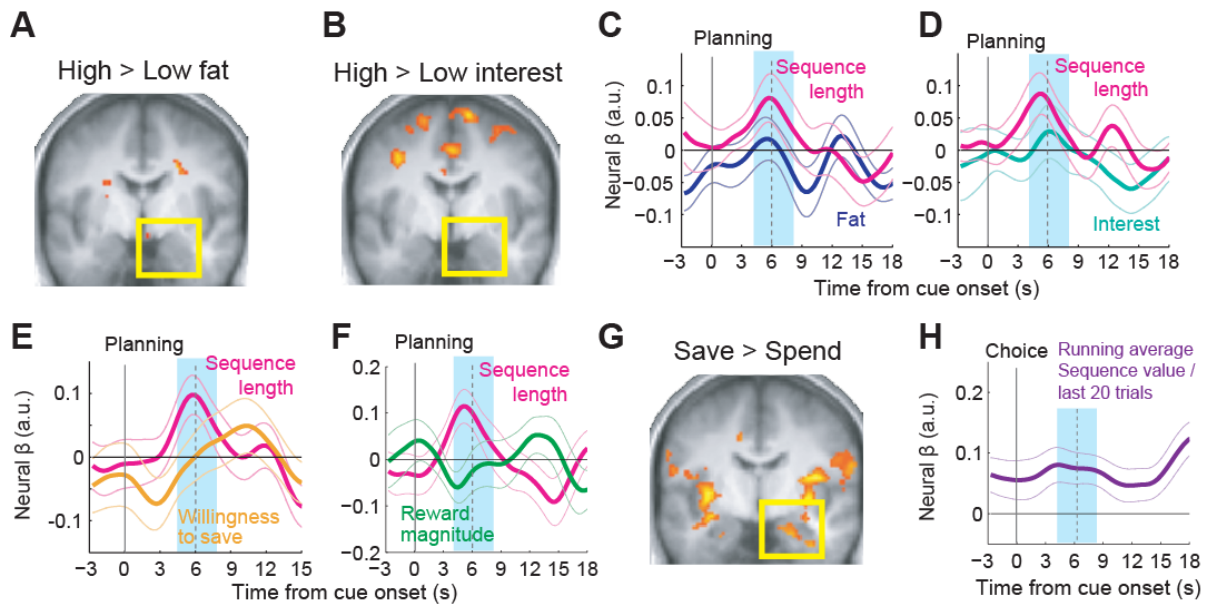

**Figure S4 (related to Figures 2, 3 and 5) | Amygdala control analyses.** **A**, Amygdala activity during the planning phase did not reflect simple cue differences between high and low fat reward conditions (non-significant effect in either direction, small volume correction, GLM5). We used the standard SPM8 settings by which regressors are orthogonalized in the order they are entered. Thus, the analysis shown here should have detected average cue effects for reward type and interest rate in amygdala if they existed. **B**, Amygdala activity during the planning phase did not reflect simple cue differences between high and low interest rate conditions (non-significant effect in either direction, small volume correction, GLM5). **C**, Region-of-interest analysis across planning phases in all trials. Regression of amygdala activity during the planning phase on sequence length and reward type. The GLM plotted here included regressors sequence length and an indicator function (“dummy variable”) for reward type (1 = high fat; 0 = low fat). Sequence length regressor was orthogonalized with respect to reward type. Only sequence length explained significant variance ( $P < 0.05$ , random effects multiple linear regression;  $t(23) = 2.12$ ). **D**, Region-of-interest analysis across planning phases in all trials. Regression of amygdala activity on sequence length and interest rate. The GLM plotted here included regressors sequence length and an indicator function (“dummy variable”) for interest rate (1 = high interest; 0 = low interest). Sequence length regressor was orthogonalized with respect to interest rate. Only sequence length explained significant variance ( $t(23) = 2.76$ ). **E**, Regression of amygdala activity on sequence length and willingness-to-save rating (saving intentions). Only sequence length explained significant variance ( $t(23) = 3.12$ ). **F**, Region-of-interest analysis across planning phases in all trials. Regression of amygdala activity on sequence length and reward magnitude. Only sequence length explained significant variance ( $t(23) = 3.13$ ). Further, including the sequence number as a proxy for duration for the experiment in a model along with sequence length to explain amygdala BOLD signal during planning had no effect on the correlation with BOLD and sequence length (sequence length still significant  $P < 0.05$ ,  $t(23) = 2.85$ ). **G**, Stronger amygdala activity during save choices compared to spend



choices (cluster  $P$  values corrected for family-wise error across the whole-brain,  $P < 0.05$ ;  $t$ -test (23) = 3.93; map thresholded at  $P < 0.005$ , uncorrected for display purposes, extent threshold  $\geq 10$  voxels). **H**, Region-of-interest analysis across choice phases in all trials. Regression of amygdala activity on running average of sequence value over the last 20 trials. Amygdala activity correlated with this variable during the choice phase ( $P < 0.05$ ,  $t(23) = 2.96$ ). Similar effects were found in ACC ( $t(23) = 2.25$ ) and DLPFC ( $t(23) = 2.19$ )).

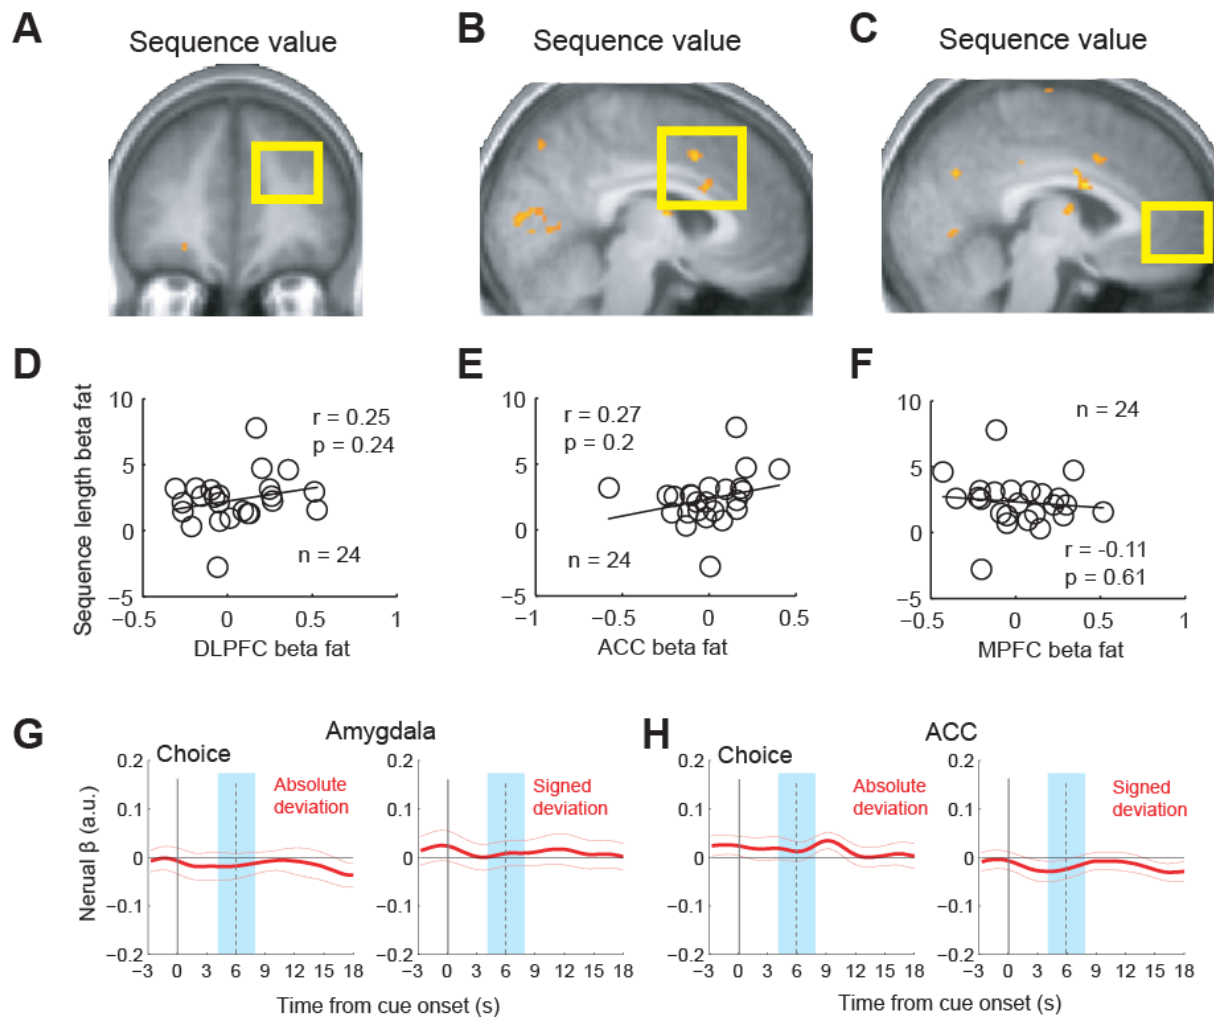

**Figure S5 (related to Figures 2-5) | fMRI control analyses.** **A-C**, Statistical maps for sequence value in the planning phase show no effect in DLPFC, ACC or MPFC (cluster  $P$  values corrected for family-wise error across the whole-brain,  $P < 0.05$ ; map thresholded at  $P < 0.005$ , uncorrected for display purposes, extent threshold  $\geq 10$  voxels). No effects were present even at lower threshold of  $P < 0.01$ , uncorrected. **D-E**, Neurometric-psychometric comparison across subjects for DLPFC, ACC and MPFC. Behavioral and neural reward  $\beta$ s plotted for all subjects as shown for amygdala in Figure 3C. Behavioral sensitivity to reward was not significantly related to neural reward sensitivity in any of the three frontal areas. **G-H**, Region of interest analyses: Neither amygdala nor ACC activity reflected the absolute or signed difference between reported saving intentions and executed sequences during choice.

**Table S1 (related to Figures 2 and 4).** Whole-brain analysis (GLM 1) results related to contrast of planning phase vs. choice phase (cluster *P* values corrected for family-wise error across the whole-brain,  $P < 0.05$ ; maps thresholded at  $P < 0.005$ , extent threshold  $\geq 10$  voxels).

| Effect                                | Sign of correlation | Anatomical region          | Hemisphere | MNI peak coordinates (x, y, z) | z-score |
|---------------------------------------|---------------------|----------------------------|------------|--------------------------------|---------|
| Planning phase > choice phase (GLM 1) | /                   | Amygdala                   | R          | 22, 0, -18                     | 5.12    |
|                                       |                     | DLPFC                      | R          | 34, 40, 32                     | 5.99    |
|                                       |                     | DLPFC                      | L          | -32, 36, 36                    | 6.27    |
|                                       |                     | ACC                        | /          | 0, 15, 42                      | 5.9     |
|                                       |                     | Thalamus                   | L          | -10, -18, 2                    | 6.93    |
|                                       |                     | Thalamus                   | R          | 8, -18, 2                      | 6.54    |
|                                       |                     | Cerebellum                 | L          | -12, -62, -18                  | 6.65    |
|                                       |                     | Intraparietal sulcus       | L          | -38, -56, 42                   | 6.5     |
|                                       |                     | Postcentral gyrus          | L          | -58, -8, 22                    | 6.48    |
|                                       |                     | Insula                     | R          | 32, -10, 10                    | 6.44    |
|                                       |                     | Cerebellum                 | R          | 26, -50, -20                   | 6.23    |
|                                       |                     | Posterior cingulate cortex | L          | -4, -20, 26                    | 6.07    |

**Table S2 (related to Figures 2 and 4).** Whole-brain analysis (GLM1-2) results related to parametric variables during planning phase (cluster *P* values corrected for family-wise error across the whole-brain, *P* < 0.05; maps thresholded at *P* < 0.005, extent threshold  $\geq$  10 voxels). \* *P* < 0.05, small volume corrected

| Effect                                  | Sign of correlation | Anatomical region                      | Hemisphere | MNI peak coordinates (x, y, z) | z-score |
|-----------------------------------------|---------------------|----------------------------------------|------------|--------------------------------|---------|
| Sequence length during planning (GLM 1) | Positive            | Amygdala*                              | R          | 22, -4, -20                    | 3.18    |
|                                         |                     | ACC                                    | /          | 6, 20, 48                      | 4.54    |
|                                         |                     | DLPFC                                  | R          | 38, 42, 26                     | 3.76    |
|                                         |                     | DLPFC                                  | R          | 36, 4, 50                      | 4.41    |
|                                         |                     | Intraparietal sulcus                   | R          | 50, -42, 38                    | 3.88    |
|                                         |                     | Intraparietal sulcus                   | L          | -26, -62, 50                   | 3.78    |
|                                         |                     | Posterior cingulate cortex             | /          | 0, -22, 28                     | 4       |
|                                         |                     | Precuneus                              | R          | 12, -66, 32                    | 4.2     |
|                                         |                     | Paracentral lobe                       | L          | -26, -22, 74                   | 3.6     |
|                                         |                     | Superior temporal gyrus                | R          | 56, -26, -10                   | 4.24    |
|                                         |                     | Striate/Extrastriate cortex            | L          | -28, -84, 2                    | 4.58    |
|                                         |                     | Striate/Extrastriate cortex            | R          | 28, -78, -8                    | 4.47    |
|                                         |                     | Sequence value during planning (GLM 2) | Positive   | Amygdala*                      | R       |
| Extrastriate cortex                     | R                   |                                        |            | 22, -86, -10                   | 3.82    |

**Table S3 (related to Figure 5).** Whole-brain analysis (GLM 6) results related to save vs. spend choice trials (cluster  $P$  values corrected for family-wise error across the whole-brain,  $P < 0.05$ ; maps thresholded at  $P < 0.005$ , extent threshold  $\geq 10$  voxels). \* Uncorrected at  $P < 0.005$ .

| Effect                                    | Sign of correlation | Anatomical region        | Hemisphere | MNI peak coordinates (x, y, z) | z-score |
|-------------------------------------------|---------------------|--------------------------|------------|--------------------------------|---------|
| Save > spend<br>(choice phase)<br>(GLM 6) | /                   | Amygdala                 | R          | 22, -2, -20                    | 3.41    |
|                                           |                     | Cerebellum               | L          | -14, -38, -20                  | 4.87    |
|                                           |                     | Middle temporal gyrus    | L          | -32, -20, -6                   | 4.35    |
|                                           |                     | Temporoparietal junction | L          | -60, -48, 22                   | 4.28    |
| Spend > save<br>(choice phase)<br>(GLM 6) | /                   | Striatum*                | /          | -6, 12, 8                      | 4.22    |

**Table S4 (related to Figure 5).** Whole-brain analysis results related to parametric variables during choice phase (cluster  $P$  values corrected for family-wise error across the whole-brain,  $P < 0.05$ ; maps thresholded at  $P < 0.005$ , extent threshold  $\geq 10$  voxels).

| Comparison                                                       | Correlation | Anatomical region                 | Hemisphere | Peak Coordinates (mm) (x, y, z) | z-score |
|------------------------------------------------------------------|-------------|-----------------------------------|------------|---------------------------------|---------|
| Sequence length during choice phase (GLM 1)                      | Positive    | ACC                               | R          | 10, 12, 46                      | 4.39    |
|                                                                  | Negative    | MPFC                              | L          | -8, 62, 24                      | 4.36    |
| Current sequence value during choice phase (GLM 3)               | Negative    | Amygdala                          | R          | 20, -2, -18                     | 3.75    |
|                                                                  |             | MPFC                              | /          | -4, 62, 10                      | 5.08    |
|                                                                  |             | Insula/ parietal operculum        | R          | 52, -8, 2                       | 4.9     |
|                                                                  |             | Insula/ transverse temporal gyrus | L          | -44, -18, 2                     | 4.48    |
|                                                                  |             | Cerebellum                        | L          | -8, -48, -16                    | 4.17    |
| Position during choice phase ('current sequence length') (GLM 4) | Positive    | ACC                               | /          | 2, 20, 42                       | 4.69    |
|                                                                  |             | Visual cortex                     | R          | 32, -84, 2                      | 4.47    |
|                                                                  |             | Visual cortex                     | L          | -20, -70, 34                    | 4.44    |
|                                                                  |             | Middle frontal gyrus              | R          | 52, 20, 36                      | 4.03    |
|                                                                  | Negative    | Insula                            | R          | 38, -8, 2                       | 5.11    |
|                                                                  |             | Insula                            | L          | -36, -6, -4                     | 5.07    |
|                                                                  |             | MPFC                              | L          | -8, 60, 12                      | 4.45    |
|                                                                  |             | Cerebellum                        | L          | -16, -58, -18                   | 4.4     |

**Table S5 (related to Figures 4-5).** Whole-brain analysis results of PPI analyses (cluster  $P$  values corrected for family-wise error across the whole-brain,  $P < 0.05$ ; maps thresholded at  $P < 0.005$ , extent threshold  $\geq 10$  voxels).

| Effect                                                        | Sign of correlation | Anatomical region           | Hemisphere | MNI peak coordinates (x, y, z) | z-score |
|---------------------------------------------------------------|---------------------|-----------------------------|------------|--------------------------------|---------|
| PPI planning > choice, DLPFC seed (GLM PPI1)                  | /                   | ACC/MPFC                    | R          | 14, 46, 24                     | 4.78    |
|                                                               |                     | Pregenua cingulate cortex   | /          | 4, 50, -14                     | 4.77    |
|                                                               |                     | MPFC                        | /          | -6, 58, 34                     | 4.54    |
|                                                               |                     | Striatum                    | L          | -8, 18, 6                      | 4.17    |
|                                                               |                     | Striatum                    | R          | 6, 16, 10                      | 4.13    |
| PPI choice > planning, DLPFC seed (GLM PPI1)                  | /                   | Intraparietal sulcus        | R          | 40, -50, 42                    | 6.21    |
|                                                               |                     | DLPFC                       | R          | 40, 40, 28                     | 5.94    |
|                                                               |                     | Supplemental motor area     | R          | 8, -2, 70                      | 4.15    |
|                                                               |                     | Middle frontal gyrus        | R          | 32, -6, 64                     | 4.12    |
|                                                               |                     | ACC                         | /          | 8, 2, 38                       | 3.91    |
|                                                               |                     | Cerebellum                  | L          | -30, -58, -28                  | 3.89    |
|                                                               |                     | Middle temporal gyrus       | L          | -48, -60, -4                   | 3.78    |
| PPI choice > planning, amygdala seed (GLM PPI1)               | /                   | Supplemental motor area     | /          | 0, -2, 68                      | 5.99    |
|                                                               |                     | ACC                         | /          | -2, 12, 36                     | 4.48    |
|                                                               |                     | Precentral gyrus            | R          | 24, -12, 58                    | 4.35    |
|                                                               |                     | Lateral temporal lobe       | L          | -38, -22, -16                  | 4.57    |
|                                                               |                     | Amygdala                    | L          | -18, -8, -20                   | 4.54    |
|                                                               |                     | Striatum                    |            | 0, -10, 12                     | 4.27    |
|                                                               |                     | Middle temporal gyrus       | L          | -44, -58, 8                    | 4.17    |
|                                                               |                     | Striate cortex              | R          | 18, -92, -4                    | 4.08    |
|                                                               |                     | Extrastriate cortex         | R          | 30, -76, -16                   | 4.06    |
|                                                               |                     | Pre-Supplemental motor area | R          | 16, 30, 48                     | 4.06    |
|                                                               |                     | Pre-Supplemental motor area | L          | -12, 26, 50                    | 4.01    |
|                                                               |                     | Precentral gyrus            | R          | 50, -10, 20                    | 3.76    |
|                                                               |                     | Insula                      | R          | 34, -24, 12                    | 3.66    |
| PPI choice > planning, ACC seed (GLM PPI1)                    | /                   | ACC                         | /          | 2, 26, 44                      | 5.79    |
|                                                               |                     | DLPFC                       | R          | 32, 48, 14                     | 5.59    |
|                                                               |                     | Insular gyrus               | R          | 50, 16, -8                     | 5.52    |
|                                                               |                     | DLPFC                       | L          | -28, 52, 12                    | 4.92    |
| PPI high > low fat (planning phase), amygdala seed (GLM PPI2) | /                   | ACC*                        | R          | 10, 28, 48                     | 3.53    |
|                                                               |                     | Intraparietal sulcus        | L          | -30, -30, 66                   | 3.4     |

|                                                               |   |                                 |   |              |      |
|---------------------------------------------------------------|---|---------------------------------|---|--------------|------|
| PPI high > low interest (planning phase), ACC seed (GLM PPI3) |   | MPFC                            | R | 18, 62, 12   | 3.5  |
| PPI save > spend (choice phase), amygdala seed (GLM PPI4)     | / | MPFC                            | R | 18, 64, 26   | 3.4  |
|                                                               |   | Ventromedial prefrontal cortex  | / | 0, 50, -8    | 3.19 |
|                                                               |   | Intraparietal sulcus            | R | 22, -34, 76  | 4.06 |
|                                                               |   | Cerebellum                      | / | -2, -62, -32 | 3.91 |
|                                                               |   | Visual cortex                   | L | -28, -86, 2  | 3.81 |
|                                                               |   | Visual cortex                   | R | 28, -86, 0   | 3.57 |
|                                                               |   | Precuneus                       | / | 2, -54, 28   | 3.42 |
| PPI save > spend (choice phase), ACC seed (GLM PPI4)          | / | DLPFC                           | R | 32, 52, 16   | 3.91 |
|                                                               |   | Middle temporal gyrus           | L | -62, -32, -8 | 4.84 |
|                                                               |   | Postcentral gyrus               | L | -14, -26, 66 | 4.7  |
|                                                               |   | Medial/superior temporal gyrus  | R | 56, -22, -2  | 4.16 |
|                                                               |   | ACC                             | R | 8, 24, 52    | 4.1  |
|                                                               |   | Ventrolateral prefrontal cortex | R | 34, 54, 0    | 4.08 |
|                                                               |   | Ventrolateral prefrontal cortex | L | -36, 48, 2   | 4.02 |
|                                                               |   | Intraparietal sulcus            | L | -50, -42, 46 | 3.93 |
|                                                               |   | Insula                          | R | 32, -14, 14  | 3.78 |
|                                                               |   | Intraparietal sulcus            | R | 18, -50, 60  | 3.64 |

\*uncorrected at P=0.005, extent threshold  $\geq$  10 voxels



## SUPPLEMENTAL EXPERIMENTAL PROCEDURES

### Participants

28 healthy individuals (age range: 18-33 years; 13 females) participated in the study. All participants had normal or corrected-to-normal vision. We had to exclude four participants from all analyses due to motion artefacts, giving a sample size of  $n = 24$  for the main saving task fMRI experiment. For two participants, no data for the separate behavioral BDM task was available due to an error in the data being written into a file, giving a sample size of  $n = 22$  for the BDM task. Participants were screened to ensure they were not lactose intolerant, generally liked dairy products, had normal appetite and were not actively trying to avoid fat or sugar in their diet. Female participants were not pregnant. None of the participants had a history of psychiatric illness. All participants were healthy according to self-report and had no recent history of medication apart from contraceptive. The Local Research Ethics Committee of the Cambridgeshire Health Authority approved the study. All participants gave written consent before the experiment.

### Experimental design

Before the scanning session, each participant took part in a behavioral session on a separate occasion to learn the task. During this session, participants performed exactly the same task as in the scanner including delivery of the liquid rewards. Participants were asked to not eat or drink anything except water for at least 4 hours before attending each session. This was done to ensure that subjects were hungry and willing to perform a task towards gaining liquid food rewards. Stimuli were presented on a screen and responses were given by pressing specific keys on a keyboard (training session) or button box (scanning session). Stimulus presentation and operant reactions were controlled and recorded using Cogent (Wellcome Trust Centre for Neuroimaging, London, UK) in Matlab (Version R2013b, Mathworks, Natick, MA).

**Economic saving task.** Subjects performed choice sequences of self-defined lengths to save different liquid rewards. The rewards accumulated according to a given interest rate (see below for interest rate calculation). The design was a  $2 \times 2$  factorial design with the factors reward type (high vs. low fat content) and interest rate (high vs. low interest). (We use the term ‘interest rate’ to provide an intuitive description of the variable that governed increases in reward across

save choices; this should not imply exact comparability with financial interest rates.) We used different reward types and interest rates to promote variation in subjects' saving behavior and to distinguish neural activity related to sequence length (which was a linear function of the number of save choices in a sequence) from activity related to sequence value (which depended on subjects' preferences for different reward types, reward amounts and their interaction). All frame durations in the task were jittered according to Poisson distributions with an additional jitter of  $\pm 200$  ms to avoid predictability and to increase fMRI image acquisition efficiency. On average, subjects performed  $42.6 \pm 1.4$  saving sequences (mean  $\pm$  s.e.m.) during the fMRI experiment, with an average  $213 \pm 2.8$  save-spend choice trials. These numbers were calculated excluding error sequences and error trials (see below) which were also excluded from all fMRI analyses.

*Planning phase.* During the planning phase, pre-trained cues indicated current interest rate (high vs. low) and current reward type (high vs. low fat content). The order of conditions (combinations of reward type and interest rate) between sequences was pseudo-randomized to avoid predictability but ensuring even numbers of each condition. Following cue presentation for 2-3 s and an inter-stimulus interval (ISI) of 2-4 s, subjects rated their willingness-to-save on a visual analogue scale ranging from 0 (low willingness-to-save) to 10 (high willingness-to-save). The rating was followed by an ISI of 2-4 s before the start of the choice phase.

*Choice phase.* During the choice phase, subjects made trial-by-trial choices to save or spend the accumulated reward. Each choice trial began with the presentation of a question mark on the screen for 2-3 s which prompted subjects to consider their save vs. spend choice for that trial. Following a 2-4 s ISI, the save cue and spend cue appeared in left-right position and subjects indicated their choice with a button press. Left-right position of save and spend cues was randomized across trials. Button presses were self-timed with the requirement that subjects indicated their choice within 3 s. A save choice was followed by a 2-3 s feedback screen stating "Saved", without providing feedback about saved reward amounts. Thus, the subjects had to track internally the accumulated reward amounts over consecutive save choices. Consecutive choice trials were separated by an inter-trial interval of 2-6 s. In each saving sequence, subjects were required to make at least one save choice. Subjects could make up to ten consecutive save choices per sequence with a cycle time of approximately 13 s per trial. A failure to respond on any trial lead to an error feedback stating "Please repeat trial" and resulted in the repetition of the trial. Accumulated saved rewards were retained across error trials. If a subject made more than the allowed ten save choices in a sequence, they received the feedback "Saved too long",

which resulted in cancellation of the saving sequence. This error occurred only rarely during the scanning experiment (mean =  $1.08 \pm 0.2$ ) as subjects were pre-trained.

*Reward phase.* The reward phase followed subjects' spend choice in each sequence. A spend choice was followed by a 2-3 s feedback screen stating "Receive X mL in 2 sec". The accumulated amount of liquid reward was then delivered via a custom-made system consisting of two peristaltic pumps (see below). After reward delivery subjects were instructed to keep the liquid in their mouth for 0.5 s before swallowing for 1.5 s. The reward delivery and swallowing periods were cued by a yellow and green fixation cross, respectively. Subjects then rated the experienced pleasantness of the liquid on a visual analogue scale ranging from 0 (very unpleasant) to 10 (very pleasant). The general protocol and procedures for liquid reward delivery in the scanner were modelled on previous fMRI studies [S1, S2].

**Liquid rewards.** The two types of liquid rewards consisted of vanilla-flavoured dairy drinks that differed in fat content. The low fat version was composed of 400 mL of skimmed milk (0.2 % fat) and the high fat version consisted of 300 mL double cream and 100 mL full fat milk (34.5% fat). Total sugar content was equal for both drinks. 10 mL of vanilla extract was added to each drink. The stimuli were based on previous human fMRI studies in which it was found that these stimuli represent potent rewards that produce activation in major reward areas [S1, S2]. The drinks were mixed in a beaker and kept cool using customized can coolers.

**Reward delivery.** The accumulated amount of liquid reward was delivered via a custom made system consisting of two peristaltic pumps (Experimental Psychology Workshop, University of Cambridge). Pumps were placed outside the scanner room in the control room. They were connected to a computer using an external National Instruments card (NI-USB-6009, National Instruments, Austin, Texas) and controlled via the Matlab Data Acquisition Toolbox. Participants received the liquid through a custom-made mouthpiece which were connected to silicone tubes of about 10 m length explicitly suitable for foodstuff (VWR International Ltd, UK).

**Interest rate calculation.** Growth in reward over consecutive save choices was calculated according to

$$x_n = b \sum_{i=0}^{n-1} q^i$$

with  $x_n$  as reward magnitude on trial  $n$ ,  $b$  as the base rate of reward magnitude, and  $q$  as the interest rate [S3, S4]. The interest rate was either high ( $q = 1.3$ ) or low ( $q = 0.9$ ), resulting in a quasi-hyperbolic growth profile for the low  $q$  and quasi-exponential growth profile for the high  $q$  (green curves in Figure 1d). Base rate was set to  $b = 0.11$ . Interest rates and reward magnitudes were chosen based on behavioral pre-testing to ensure that subjects could discriminate the different reward magnitudes and were still able to drink the highest reward magnitude (6.2 mL) in the scanner. The following provides an example of how reward magnitudes were calculated. With a base rate of  $b = 0.11$  and an interest rate of  $q = 1.3$ , on the first trial of the choice sequence the reward magnitude (RM) would correspond to  $RM = 0.11 \times (1 + 1.3) = 0.25$  ml. On the second trial, with two successive save choices,  $RM = 0.11 \times (1 + 1.3 + 1.3^2) = 0.44$  ml. On the third trial, with three successive save choices,  $RM = 0.11 \times (1 + 1.3 + 1.3^2 + 1.3^3) = 0.68$  ml. The interest rate calculation adopted for this experiment does not exactly match calculations commonly employed in financial theory. The definition described above was used in order to yield a decreasing marginal increase of reward for the low interest condition (see Figure 1D left most panel and third panel from the left).

**Auction-like economic valuation task.** Volunteers bid for different options in an adaptation of the Becker-DeGroot-Marschak [S5] auction-like task. Options mimicked the available combinations of sequence length and reward magnitude for each experimental condition (defined by combinations of reward type and interest rate) of the saving task. Specifically, each option consisted of a combination of reward magnitude (mL), reward type (high/low fat), and sequence length. There were 40 options in total, one for every possible sequence length in each of the four conditions. An example option would be “save 7 times to receive 2.6 mL of the high fat reward”. Information about the required number of save choices and the available reward magnitudes were provided in text form, whereas information about reward type was shown in the same way as in the main saving task, i.e. using a colored cue (Figure 1C). After viewing the current option, the phrase “bid?” appeared below the option, followed by a response by the subject in the range of 1 (low) to 5 (high) on a keyboard. Subjects were informed that not all auctions and related saving sequences would be implemented but that a small number of auctions would be selected randomly by the computer. Three second-price-auctions were

randomly implemented, one each between trials 5-10, 15-20 and 25-30. For each auction one randomly chosen bid placed by the subject was compared to a randomly generated number between 1 and 5. If the subject's bid was higher or equal to the randomly generated number, the subject "won" the auction. Winning the auction resulted in guided performance of the sequence that the subject had bid for. Each subject started with a certain number of points as their endowment, the remainder of which could be converted into drink after the task at an exchange rate of 1 point to 0.5 mL of drink. Volunteers were carefully instructed about the rules of the task to yield true valuations of each option. Post-instruction questionnaires confirmed that subjects understood the task rules and the different choice options. Subjects indicated that they found the description of the task in terms of save-spend decisions intuitive.

### **Behavioral data analysis**

**Saving index.** To quantify differences in saving behavior between subjects and conditions, we calculated a saving index as follows (Figure 1E). Within each subject and condition, we determined the frequency of observing a saving sequence of a specific length relative to all possible saving lengths (Figure 1D). These relative frequencies summed to 1.0 across sequence lengths within a given condition. We then weighted (multiplied) these relative frequencies with their associated sequence lengths, thereby giving higher weight to higher sequence lengths. We then calculated the mean over these weighted sequence lengths for a given condition (defined by combination of reward type and interest rate). Thus,

$$Saving\ index_q = \frac{1}{n} \sum_{i=1}^n P_{i,q} SL_i,$$

with  $Saving\ index_q$  as the saving index for a given condition  $q$  (defined by a combination of reward type and interest rate),  $n$  as the maximal sequence length ( $n = 10$  in all conditions),  $P_{i,q}$  as the mean relative frequency of observing a saving sequence of length  $i$  in condition  $q$ , and  $SL_i$  as the number of successive save choices required to obtain sequence length  $i$ .

**Subjective values.** As economic choices critically depend on the subjective values individuals derive from choice options, we estimated subjective values associated with specific saving sequences, following our previous approach from monkey experiments [S3, S4]. These

subjective values depended on final reward amounts and current reward type but also on expenditure related to sequence length. As higher reward amounts required longer sequences (determined by current interest rate), the value of the sequence was compromised by temporal delay and physical effort. To capture these influences on value in a direct manner, we followed the general notion of standard economic choice theory and estimated subjective values from observed behavioral choices.

We estimated the subjective value of different saving sequences by calculating the relative frequency with which each sequence length was chosen within a given condition. We then multiplied this frequency with the objective reward magnitude associated with the sequence length (Figure 1D, green curves). As identical sequence lengths were associated with different reward magnitude for different interest conditions, we multiplied these relative choice probabilities with objective reward magnitudes to account for magnitude differences between interest rates. This definition follows general economic approaches whereby reward magnitudes are weighted by their probability of occurrence. Thus, the subjective value for spending at any position  $i$  in the choice sequence was defined as

$$\text{Sequence value}_i = P_i \times RM_i$$

with  $P_i$  as the relative frequency of observing a spend choice at a given point  $i$  in a saving sequence (defined by the number of consecutive save choices) and with  $RM_i$  as the reward magnitude (in mL) resulting from spending on that trial. The sequence value actually realized in a specific saving sequence (which we call ‘sequence value’ in the paper) constituted the subjective value of that sequence, which was our main value regressor for neural activity in the planning phase (Figure 2C, D). We defined the sequence value as choice probability weighted by reward magnitude in order to account for value differences between interest rates conditions: for high interest rates, a given sequence length was associated with higher reward magnitude (compared to low the interest rate) which likely resulted in higher subjective value. A supplemental logistic regression indicated that choice frequency and reward magnitude accounted for separate variance in subjects’ trial-by-trial choices (Figure S2B), consistent with previous results in monkeys [S3]. The sequence value associated with a given trial in a sequence, irrespective of whether the subject chose to spend on that trial (‘current sequence value’), was used for logistic regression of trial-by-trial choices on values (Figure 1F, Figure S2) and constituted our main value regressor for neural activity in the choice phase (Figure 5A,

B, G, H). For comparisons across subjects, sequence value was normalized to the maximum value in each subject. Out-of-sample prediction confirmed that subjective values elicited in the first session (day 1, behavior only) predicted choices in the scanning session (day 2) well (Figure S2A, inset).

To model trial-by-trial save-spend choices, we defined the value of a save choice at a given position in a saving sequence ('save value') as the average sequence value associated with all potential future trials of that sequence. Thus, the subjective value for saving at a given point  $n$  in a sequence was

$$\text{Save value}_n = \frac{1}{m-n} \sum_{i=n+1}^m \text{Sequence value}_i,$$

with  $m$  defining the upper limit of the saving sequence (given by the maximal observed sequence length for the subject and condition). Thus, 'current sequence value' and 'save value' reflected trial-by-trial valuations, whereas 'sequence value' constituted the value of the finally chosen sequence.

The adequacy of these value definitions for modelling saving behavior was demonstrated previously in monkey experiments [S3, S4], and was confirmed in the present human study by a logistic regression of save-spend choices on values (Figure 1F, Figure S2), by significant correlation of subjective values with stated saving intentions ( $R = 0.42$ ,  $P < 0.001$ ), and by correlation of subjective values with subjects' bids in the BDM task ( $R = 0.39$ ,  $P < 0.001$ ).

**Linear and logistic regression analysis of behavior.** We used the following multiple regression analyses to examine influences on subjects' saving behavior. All regressions were performed at the random-effects level (i.e. regression coefficients were estimated separately for each subject and then entered into one-sample t-tests at the group level). To assess the influence of the objective factors reward type and interest rate and their interaction on subjects' saving behavior, we performed the following linear regression:

$$\text{Sequence length} = \beta_0 + \beta_1 \text{Reward} + \beta_2 \text{Interest} + \beta_3 \text{Reward} \times \text{Interest} + \varepsilon$$

with *Sequence length* as the observed sequence length, *Reward* as the current reward type

(dummy variable for high vs. low fat content, with 1 indicating high fat and 0 indicating low fat), *Interest* as the current interest rate (dummy variable for high vs. low interest rate with 1 indicating high interest and 0 indicating low interest), *Reward*  $\times$  *Interest* as interaction term,  $\beta_0$  as constant term,  $\beta_1$  to  $\beta_3$  as the corresponding slope parameter estimates, and  $\varepsilon$  as residual.

In a second regression we tested whether there was an effect of the length of the last sequence on choice behavior by adding the factor *Last sequence length* to the model described above:

$$\begin{aligned} \text{Sequence length} = & \beta_0 + \beta_1 \text{Reward} + \beta_2 \text{Interest} + \beta_3 \text{Reward} \times \text{Interest} \\ & + \beta_4 \text{Last sequence length} + \varepsilon \end{aligned}$$

To model trial-by-trial save-spend choices, we used the subjective values defined above ('current sequence value' and 'save value') as explanatory variables in a logistic regression model (Figure 1F, Figure S2A):

$$\begin{aligned} y = & \beta_0 + \beta_1 \text{Sequence value} + \beta_2 \text{Save value} + \beta_3 \text{Reward} + \beta_4 \text{Interest} + \beta_5 \text{Reward} \\ & \times \text{Interest} + \beta_6 \text{Cue position} + \beta_7 \text{Total reward} \\ & + \beta_8 \text{SeqVal running average} + \varepsilon \end{aligned}$$

with  $y$  as trial-by-trial save-spend choice (0 indicating spend choice, 1 indicating save choice), *Sequence value* as current sequence value, *Save value* as save value, *Cue position* as the left-right position of the save cue (0 indicating left, 1 indicating right) to model potential side biases, *Total reward* as a running index of consumed liquid over the whole experiment to model potential satiation effects, *SeqVal running average* as the average obtained sequence value over the last 20 trials,  $\beta_0$  as constant term,  $\beta_1$  to  $\beta_8$  as the corresponding slope parameter estimates, and  $\varepsilon$  as residual. We also performed an out-of-sample prediction using the behavioral data from the first testing session (day 1) to derive subjective values and predict choices in the subsequently performed scanning session (Figure S2A, inset).

To separately model the sequence value components we performed the following logistic regression model:

$$y = \beta_0 + \beta_1 \text{Relative Choice Frequency} + \beta_2 \text{Reward Magnitude} + \beta_3 \text{Save value} + \varepsilon$$



with  $y$  as trial-by-trial save-spend choice (0 indicating spend choice, 1 indicating save choice), *Relative Choice Frequency* as relative choice frequency of the current sequence length, *Reward Magnitude* as reward magnitude available on the current trial and other variables defined as above. The results are shown in Figure S2B.

In a further analysis, we modeled choices in terms of the observed cumulative probability to spend on a given trial, which we derived from separate behavioral data collected during the first testing session. The regression was of the following form:

$$y = \beta_0 + \beta_1 P(\text{Spend}) + \beta_2 \text{Cue position} + \beta_3 \text{Total reward} + \varepsilon$$

with  $y$  as trial-by-trial save-spend choice (0 indicating spend choice, 1 indicating save choice),  $P(\text{Spend})$  as cumulative spend probability over consecutive save trials derived from separate data and other variables as defined above. The results are shown in Figure S2C.

To analyse the influences on reported saving intentions and reported pleasantness we performed two separate multiple linear regression analyses of the following form:

$$y = \beta_0 + \beta_1 \text{Sequence number} + \beta_2 \text{Total Reward} + \beta_3 \text{Reward} + \beta_3 \text{Interest} \\ + \beta_5 \text{Reward} \times \text{Interest} + \beta_6 \text{Cue position} + \varepsilon$$

with  $y$  being either willingness-to-save or subjective pleasantness, *Sequence number* as running index of sequences performed over the whole scanning experiment, i.e. across all three runs (with the first performed sequence in the experiment taking the value of 1) and other variables as defined above. The resulting data are shown in Figure S2D-E.

To examine deviations between sequence length (observed behavior) and willingness-to-save (reported saving intentions), we performed the following multiple linear regression analysis:

$$y = \beta_0 + \beta_1 \text{Sequence Value} + \beta_2 \text{Reward} + \beta_3 \text{Interest} + \beta_3 \text{Reward} \times \text{Interest} \\ + \beta_5 \text{Subject ID} + \beta_6 \text{Amygdala planning activity} \\ + \beta_7 \text{ACC planning activity} + \beta_8 \text{DLPFC planning activity} + \varepsilon$$

with  $y$  being the deviation (i.e. signed difference) between saving intentions and sequence length (willingness-to-save – sequence length), , *Amygdala planning activity* as the peak

BOLD signal in amygdala during the planning phase, *ACC planning activity* as the peak BOLD signal in ACC during the planning phase, *DLPFC planning activity* as the peak BOLD signal in DLPFC during the planning phase, and other variables as defined above. The resulting data are shown in Figure S2F.

**Response time analysis.** To analyse the influences on response times we performed a multiple linear regression analysis of the following form:

$$y = \beta_0 + \beta_1 \textit{Save vs. spend} + \beta_2 \textit{WTS} + \beta_3 \textit{Current sequence length} \\ + \beta_4 \textit{Final sequence length} + \beta_5 \textit{Current sequence value} \\ + \beta_6 \textit{Final sequence value} + \beta_7 \textit{Save value} + \varepsilon$$

with  $y$  being the response time for the respective trial, *Save vs. spend* as a dummy variable for save (1) or spend (0), *WTS* as reported saving intentions, *Current sequence length* as the current sequence length, i.e. the position within the current sequence, *Final sequence length* as the final sequence length of the current sequence, *Current sequence value* as the sequence value available if the subject were to spend immediately, *Final sequence value* as the sequence value obtained in that sequence by the subject, *Save value* as the save value for the current trial within the sequence,  $\beta_0$  as constant term,  $\beta_1$  to  $\beta_7$  as the corresponding slope parameter estimates, and  $\varepsilon$  as residual. The resulting data are shown in Figure S2G. To assess whether response times systematically decreased or increased across the scanning session we regressed response times on the current trial number across the whole scanning experiment. The data are described in the Results section ‘Saving behavior and subjective value model’. Since subjects often deviated from their reported willingness-to-save, we were interested in investigating the hypothesis that response times are faster in spend trials in which subjects spent earlier than indicated by their willingness-to-save (‘premature spend trial’) compared to when they meet their reported willingness-to-save. We calculated the mean response time for each of these two trial types for each subject and in a second step entered these means into a second-level t-test across subjects. The results are described in the Results section ‘Saving behavior and subjective value model’.

**Relationship of relative choice frequency and rate of reward return.** We tested whether subjects’ observed behavior (relative choice frequency) was related to the rate of reward return, defined as the additional reward magnitude to be gained (mL) by choosing to save in the current

trial. To this end we pooled the relative choice frequency of all subjects for each condition and regressed this on the rate of return for the corresponding trial. Perfect matching of choice frequency to rate of return would result in a positive linear relationship between the two variables. The results are shown in Figure S3 and mentioned in the Results section ‘Saving behavior and subjective value model’.

### **fMRI data acquisition**

We acquired echo T2\*-weighted echo-planar images (EPIs) with blood-oxygen-level-dependent (BOLD) contrast using a Siemens 3T Trio Scanner at the Wolfson Brain Imaging Centre, Cambridge, UK. Data were acquired with in plane resolution  $3 \times 3 \times 2$  mm, 2 mm slice thickness, 56 slices, repetition time (TR) = 3 s, echo time (TE) = 30 ms, flip angle =  $90^\circ$  and field of view = 192 mm. Between 401 and 470 volumes were acquired in three separate runs for each participant, along with 4 “dummy” volumes before each scanning run. The acquisition plane was tilted by -30 degrees with respect to the anterior commissure–posterior-commissure axis and a z-shim gradient pre-pulse was applied to minimize signal dropout in inferior frontal and medial temporal lobe areas [S6]. High-resolution T1 structural scans were acquired using an MPRAGE sequence and co-registered to enable group level anatomical localization with the following sequence parameters:  $1 \times 1 \times 1$  mm<sup>3</sup> voxel resolution, 1 mm slice thickness, TR = 2.3 s, TE = 2.98 ms, inversion time 900 ms, flip angle =  $9^\circ$ .

### **fMRI data analysis**

We performed the fMRI data analysis using statistical parametric mapping (SPM8; Wellcome Trust Centre for Neuroimaging, London). Preprocessing included realignment of functional data including motion correction, normalization to the Montreal Neurological Institute (MNI) coordinate system, and smoothing with a Gaussian kernel with full width at half maximum (FWHM) of 6 mm. A high-pass temporal filter with a cut-off period of 128 s was applied. General linear models (GLMs) assuming first-order autoregression were applied to the time course of activation in which event onsets were modelled as single impulse response functions convolved with the canonical hemodynamic response function. Time derivatives were included in the basis functions set. Linear contrasts of parameter estimates were defined to test specific effects in each individual dataset. Voxel values for each contrast resulted in a statistical parametric map of the corresponding *t* statistic. In the second (group random-effects) stage,

subject-specific linear contrasts of these parameter estimates were entered into one-sample t-tests, as described below, resulting in group-level statistical parametric maps. We estimated the following GLMs to test specific hypotheses:

*GLM 1.* This GLM served three purposes: (1) to identify brain areas more strongly activated in the planning phase compared to the choice phase (Figures 2A, 4A), (2) to search for regions correlating with the length of the forthcoming sequence ('sequence length') during the planning phase (Figures 2B, 4B), and (3) to search for regions correlating with the final length of the current choice sequence during the choice phase. For each subject we estimated a GLM with the following regressors of interest: (R1) an indicator function for the choice phase, i.e. the times when subjects were presented with the question mark cue prompting them to consider their save-spend decision for the current trial; (R2) R1 modulated by the final sequence length of the current choice sequence; (R3) an indicator function for the action phase, i.e. the times when the save and spend cue were presented and the subject could enter their choice using the button box; (R4) R3 modulated by an indicator function indicating whether the subject chose the cue presented on the left or on the right; (R5) an indicator function for the planning phase, i.e. the times when cues indicating interest rate and reward type were shown; (R6) R5 modulated by the length of the forthcoming choice sequence ('sequence length'); (R7) an indicator function for the willingness-to-save rating phase, i.e. the times when subjects indicated their willingness-to-save on a visual analogue scale from 0 (low) to 10 (high); (R8) an indicator function for the reward delivery period, i.e. the times when reward was delivered into the subject's mouth; (R9) R8 modulated by the reward magnitude (in mL); (R10) an indicator function for the pleasantness-rating phase, i.e. the times when the subjects indicated the pleasantness of the received reward; (R11-R17) the motion parameters resulting from the realignment pre-processing step as covariates of no interest; (R18-R20) three session constants.

*GLM 2.* This GLM identified regions associated with sequence value (Figure 2C, Figure S5A-C). It included the following regressors: (R1) an indicator function for the choice phase; (R2) R1 modulated by the sequence value (i.e. the final chosen sequence value) of the current choice sequence. (R3) an indicator function for the action phase; (R4) R3 modulated by an indicator function indicating whether the subject chose the cue presented on the left or on the right; (R5) an indicator function for the planning phase; (R6) R5 modulated by sequence value; (R7) an indicator function for the willingness-to-save rating phase; (R8) an indicator function for the reward delivery period; (R9) R8 modulated by the pleasantness rating; (R10) an indicator

function during the pleasantness-rating phase. The remaining details were the same as in GLM1.

*GLM 3.* This GLM identified regions associated with the trial-by-trial evolving ‘current sequence value’ (Figure 5A, G). It included the following regressors: (R1) an indicator function for the choice phase; (R2) R1 modulated by current sequence value; (R3) R1 modulated by save value; (R4) R1 modulated by sequence value (i.e. the final chosen sequence value); (R5) An indicator function for the action phase; (R6) R5 modulated by an indicator function indicating whether the subject chose the cue presented on the left or on the right; (R7) an indicator function for the planning phase; (R8) R7 modulated by sequence value; (R9) an indicator function for the willingness-to-save rating phase; (R10) an indicator function for the delivery period; (R12) an indicator function during the pleasantness-rating phase. The remaining details were the same as in GLM1.

*GLM 4.* This GLM identified areas in which activity correlates with the current sequence length during the choice phase (Figure 5E). It included the following regressors: (R1) an indicator function for the choice phase; (R2) R1 modulated by the current sequence length of the ongoing choice sequence; (R3) R1 modulated by the final sequence length of the current choice sequence; (R4) an indicator function for the action phase; (R5) R4 modulated by an indicator function indicating whether the subject chose the cue presented on the left or on the right; (R6) an indicator function for the planning phase; (R7) R6 modulated by sequence length; (R8) an indicator function for the willingness-to-save rating phase; (R9) an indicator function for the delivery period; (R10) R9 modulated by the pleasantness rating; (R11) an indicator function during the pleasantness-rating phase. The remaining details were the same as in GLM1.

*GLM 5.* This GLM served to test whether parametric effects during the planning phase could be explained by the objective factors fat and interest (Figure S4A,B). The model contained the following regressors: (R1) an indicator function for the choice phase; (R2) R1 modulated by current sequence length; (R3) an indicator function for the action phase; (R4) R3 modulated by an indicator function indicating whether the subject chose the cue presented on the left or on the right; (R5) an indicator function for the planning phase in the low interest, low fat condition; (R6) R5 modulated by sequence length; (R7) an indicator function for the planning phase in the high interest, low fat condition; (R8) R7 modulated by sequence length; (R9) an indicator function for the planning phase in the low interest, high fat condition; (R10) R9 modulated by

sequence length; (R11) an indicator function for the planning phase in the high interest, high fat condition; (R12) R11 modulated by sequence length. The remaining details are the same as for GLM1.

*GLM 6.* This GLM served to contrast trials in which subjects chose to save with those in which they chose to spend (i.e. consume) (Figure S4G). It included the following regressors: (R1) an indicator function for the choice phase in trials in which the subject chose to save; (R2) an indicator function for the choice phase in trials in which the subject chose to spend; R3 to R10 were the same as in GLM 1. The remaining details are the same as for GLM1.

**Functional connectivity analysis.** We assessed functional connectivity using the psychophysiological-interaction (PPI) approach [S7, S8]. For each subject we first extracted eigenvariates for a  $6 \times 6 \times 6$  voxel cluster around a seed voxel based on the peak voxels identified by the correlation with sequence length during the planning phase (the main planning variable in the economic saving task). The peak voxel used for each subject was determined using a leave-one-out procedure by re-estimating our second level analysis 23 times, each time leaving out one subject. Starting at the respective peak voxel for correlation with sequence length we selected the nearest peak in these cross-validation analyses. Time courses were deconvolved with the canonical hemodynamic response function (HRF) to construct a time series of neural activity in the region of interest. We estimated the following PPI GLMs to test specific hypotheses.

*PPI 1.* This GLM tested for differential coupling between brain areas as a function of task phase (planning vs. choice phase). The results are shown in Figures 4E and 5I. The model contained the following regressors: (R1) a psychophysiological interaction regressor between the time series of activity in a seed brain area, extracted as just described, and a contrast between planning phase vs. choice phase; (R2) the time series of activity in a seed brain area, extracted as just described; (R3) a contrast between planning phase vs. choice phase; (R4-R9) the motion parameters resulting from the realignment pre-processing step as covariates of no interest; (R10-R12) three session constants. This model was estimated for the seed regions amygdala, ACC and DLPFC.

*PPI 2.* This GLM tested for differential coupling between brain areas in the planning phase as a function of reward type (high fat vs. low fat). The results are shown in Figure 4E. The model

contained the following regressors: (R1) a psychophysiological interaction regressor between the time series of activity in a seed brain area, extracted as just described, and a contrast between the planning phase trials in which high fat cues were shown and planning phase trials in which low fat cues were shown; (R2) the time series of activity in a seed brain area, extracted as just described; (R3) a contrast between the planning phase trials in which high fat cues were shown and planning phase trials in which low fat cues were shown; (R4-R9) the motion parameters resulting from the realignment pre-processing step as covariates of no interest; (R10-R12) three session constants. This model was estimated for the seed regions amygdala, ACC and DLPFC.

*PPI 3.* This GLM tested for differential coupling between brain areas in the planning phase as a function of interest rate (high interest vs. low interest). The results are shown in Figure 4E. The model contained the following regressors: (R1) a psychophysiological interaction regressor between the time series of activity in a seed brain area, extracted as just described, and a contrast between the planning phase trials in which high interest cues were shown and planning phase trials in which low interest cues were shown; (R2) the time series of activity in a seed brain area, extracted as just described; (R3) a contrast between the planning phase trials in which high interest cues were shown and planning phase trials in which low interest cues were shown; (R4-R9) the motion parameters resulting from the realignment pre-processing step as covariates of no interest; (R10-R12) three session constants. This model was estimated for the seed regions amygdala, ACC and DLPFC.

*PPI 4.* This GLM tested for differential coupling between brain areas in the choice phase as a function of current-trial choice (save vs. spend). The results are shown in Figure 5I. The model contained the following regressors: (R1) a psychophysiological interaction regressor between the time series of activity in a seed brain area, extracted as just described, and a contrast between the choice phase trials in which the subject chose to save and choice phase trials in which the subject chose to spend; (R2) the time series of activity in a seed brain area, extracted as just described; (R3) a contrast between the choice phase trials in which the subject chose to save and choice phase trials in which the subject chose to spend; (R4-R9) the motion parameters resulting from the realignment pre-processing step as covariates of no interest; (R10-R12) three session constants. This model was estimated for the seed regions amygdala, ACC, DLPFC, and MPFC.

For all models, the regressors were constructed using the standard deconvolution procedure as implemented in SPM8 [S8]. For each model, we calculated single-subject first-level contrasts for the PPI regressor (R1) that were then entered into a second level analysis by calculating a one-sample t-test across the single subject coefficients. The results are shown in Figure 4E, Figure 5I and Table S5.

**Statistical significance testing.** For all fMRI analyses, we report effects that survive correction for multiple comparisons across the whole brain using a significance level of  $P < 0.05$  (family-wise error) at cluster level, imposed on maps that were displayed at  $P < 0.005$  with minimum cluster size  $k = 10$  voxels. In addition, we used small volume correction ( $P < 0.05$ , cluster-level) in the amygdala, for which we had strong *a priori* hypotheses based on previous human fMRI [S9] and animal single-neuron recording [S3, S4] studies. Small volume correction was performed in a sphere of 6 mm radius that was centred on specific amygdala coordinates [18, -6, -22] reported in a previous fMRI study on food reward and decision-making [S9]. (Very similar coordinates for amygdala activation are found across several studies involving food reward or decision-making [S2, S10, S11].)

**Region of interest analysis.** We produced time courses from region of interest (ROI) analyses according to the following method [S12]. We extracted raw BOLD data from ROI coordinates based on group clusters, which we defined independently for each subject using a leave-one-out procedure. (We re-estimated the second-level analysis 23 times, each time leaving out one subject to define the ROI coordinates for the left-out subject.) Following data extraction we applied a high-pass filter with a cut off period of 128 s. The data were then z-normalized, oversampled by a factor of 10 using sinc-interpolation, and separated into trials to produce a matrix of trials against time. We generated separate matrices for each event of interest (e.g. onset of planning phase or choice phase). We then fitted GLMs to each oversampled time point across trials separately in each subject. The GLMs were designed to test specific hypotheses as described in the text. In addition to the regressors shown in each figure, the GLMs included motion parameters as covariates of no interest. This GLM analysis yielded one regression coefficient for each regressor for every oversampled time point in each subject. We entered individual-subject coefficients into one-sample t-tests (random-effects analysis,  $P < 0.05$ ) and calculated group averages and standard errors for each time point across participants, yielding the across-subject effect size time courses shown in the figures. These mean effect size time courses are shown for the amygdala in Figure 2D and 5B and Figure S4C-F,H and Figure 3B;



the DLPFC time courses are shown in Figure 4C, 5D; the ACC time courses are shown in Figure 5F; the MPFC time courses are shown in Figure 5H.

For the time courses shown in Figure 2F, we performed the following analysis. First, in a ROI analysis (as just described), for each subject we regressed sequence length and sequence value on the oversampled BOLD data for each time point in the planning phase. This yielded regression coefficients for sequence value and sequence length for each time point during the planning phase. We then used these regression coefficients to fit two models to amygdala activity to obtain predicted (i.e. modelled) amygdala activity based on sequence length ('sequence length signal') and sequence value ('sequence value signal'). To relate these two signals to the willingness-to-pay (BDM) bids obtained in the auction-like task, we calculated a sequence length signal and a sequence value signal as just described for all specific saving sequences chosen by each subject (a specific saving sequence for this analysis was defined by sequence length and experimental condition, i.e. the combination of reward type and interest rate). We then regressed the willingness-to-pay (BDM) bids for each specific saving sequence on the corresponding sequence length and sequence value signals, separately for each time point in the planning phase and for each subject. We entered individual-subject coefficients into one-sample t-tests (random-effects analysis,  $P < 0.05$ ) and calculated group averages and standard errors for each time point across participants, yielding across-subject effect size time courses. The resulting mean effect size time courses are shown in Figure 2F.

The region-of-interest analysis in Figure S4C was done to show the effect of sequence length in amygdala when variance related to reward type had been accounted for. We tested for reward effects with a direct indicator variable for fat content across all sequences (1 = high fat; 0 = low fat) and then entered sequence length as second regressor, orthogonalizing sequence length with respect to reward type. The figure thus shows that amygdala planning activity reflects sequence length even if sequence length variation due to reward type is removed. Using the same approach, the analysis in Figure S4D was done to show the effect of sequence length in amygdala when variance related to interest rate had been accounted for. The figure thus shows that amygdala planning activity codes sequence length even if sequence length variation due to interest rate is removed. Together, these control analyses show that our main effect of amygdala sequence length coding in the planning phase is not explained by simple effects of either reward type or interest rate (or related cue responses). Rather, amygdala planning activity seems to reflect the internally planned, forthcoming length of the current sequence.

To test for relationships between specific behavioral and neural effect sizes, we extracted neural effects sizes from individual subject's data using the leave-one-out procedure described above. The resulting effect size scatter plots are shown in Figures 3C, 4D, 4F, 5J, Figures S5D-F. This method was also used to obtain the correlations between PPI effect sizes stated in the main text.

**Shared variance and relationship between our main variables.** We calculated the shared variance between our main regressors for fMRI data analysis within each subject. The shared variances were as follows: sequence length and sequence value:  $R^2 = 0.22 (\pm 0.16)$ ; sequence length and willingness-to-save ratings:  $R^2 = 0.58 (\pm 0.13)$ ; sequence length and BDM bids (correlations involving BDM bids were calculated for those 22 subjects for whom BDM data were available):  $R^2 = 0.36 (\pm 0.28)$ ; sequence value and willingness-to-save ratings:  $R^2 = 0.18 (\pm 0.13)$ ; sequence value and BDM bids:  $R^2 = 0.37 (\pm 0.28)$ .

## SUPPLEMENTAL REFERENCES

- S1. Grabenhorst, F., and Rolls, E.T. (2014). The representation of oral fat texture in the human somatosensory cortex. *Human Brain Mapping* 35, 2521-2530.
- S2. Grabenhorst, F., Rolls, E.T., Parris, B.A., and d'Souza, A.A. (2010). How the Brain Represents the Reward Value of Fat in the Mouth. *Cereb Cortex* 20, 1082-1091.
- S3. Grabenhorst, F., Hernádi, I., and Schultz, W. (2012). Prediction of economic choice by primate amygdala neurons. *Proc Natl Acad Sci USA* 109, 18950-18955.
- S4. Hernadi, I., Grabenhorst, F., and Schultz, W. (2015). Planning activity for internally generated reward goals in monkey amygdala neurons. *Nat Neurosci* 18, 461-469.
- S5. Becker, G., DeGroot, M., and Marschak, J. (1964). Measuring utility by a single-response sequential method. *Behavioral Science* 9, 226-232.
- S6. Deichmann, R., Gottfried, J.A., Hutton, C., and Turner, R. (2003). Optimized EPI for fMRI studies of the orbitofrontal cortex. *NeuroImage* 19, 430-441.
- S7. Friston, K.J., Buechel, C., Fink, G.R., Morris, J., Rolls, E., and Dolan, R.J. (1997). Psychophysiological and Modulatory Interactions in Neuroimaging. *NeuroImage* 6, 218-229.
- S8. Gitelman, D.R., Penny, W.D., Ashburner, J., and Friston, K.J. (2003). Modeling regional and psychophysiological interactions in fMRI: the importance of hemodynamic deconvolution. *Neuroimage* 19, 200-207.
- S9. Grabenhorst, F., Schulte, F.P., Maderwald, S., and Brand, M. (2013). Food labels promote healthy choices by a decision bias in the amygdala. *NeuroImage* 74, 152-163.
- S10. De Martino, B., Kumaran, D., Seymour, B., and Dolan, R.J. (2006). Frames, Biases, and Rational Decision-Making in the Human Brain. *Science* 313, 684-687.
- S11. Sharot, T., Riccardi, A.M., Raio, C.M., and Phelps, E.A. (2007). Neural mechanisms mediating optimism bias. *Nature* 450, 102-105.
- S12. Behrens, T.E., Hunt, L.T., Woolrich, M.W., and Rushworth, M.F. (2008). Associative learning of social value. *Nature* 456, 245-249.
